# Supplementary material for: Single-crystal X-ray diffraction and Raman spectroscopy studies of isobaric N2 adsorption in SOD-type metal–organic zeolites
Source: Royal Society of Chemistry journal article supplement (doi:10.1039/c2cc35544b), 2012-01-01
Supplement: c2cc35544b.pdf [file c2cc35544b.pdf]

Supporting Information for

**Single-crystal X-ray diffraction and Raman spectroscopy studies of isobaric N<sub>2</sub> adsorption in SOD-type metal-organic zeolites**

Jie-Peng Zhang\*, Ai-Xin Zhu, and Xiao-Ming Chen\*

*MOE Key Laboratory of Bioinorganic and Synthetic Chemistry, State Key Laboratory of Optoelectronic Materials and Technologies, School of Chemistry and Chemical Engineering, Sun Yat-Sen University, Guangzhou 510275, China.*

\*E-mail: zhangjp7@mail.sysu.edu.cn, cxm@mail.sysu.edu.cn

## Experimental details

Single crystals of MAF-4 and MAF-7 were synthesized according to the literature.<sup>2b, 5</sup> The intensity data were collected on a Bruker Apex CCD area-detector diffractometer (Mo-K $\alpha$ ). All diffraction data sets of a given compound were collected continuously from a single specimen. The single-crystal specimen was mounted on the top of a glass fiber with minimum amount of glue to allow free gas diffusion into the crystal. The measurement temperatures were controlled by an open-flow dry N<sub>2</sub> cryostat (Rigaku GN2), and corrected by a thermocouple at the position of the crystal. Each data set was measured after the specimen was stayed at the targeted temperature after 5 min and no further change of the unit-cell parameters. Only for special purpose, the single crystal was further coated with a very thin layer of Vaseline to slow down the gas diffusion rate.

Absorption corrections were applied by using multi-scan program SADABS. The structures were solved with the direct method and refined with a full-matrix least-squares technique with the SHELXTL program package. The organic hydrogen atoms were generated geometrically and refined in a riding model. Anisotropic thermal parameters were applied to all non-hydrogen atoms except some guest molecules.

**Table S1.** Crystallographic data and refinement parameters of MAF-4·xN<sub>2</sub>.

| Compound                                                        | MAF-4·0.2N <sub>2</sub>                             | MAF-4·3.50N <sub>2</sub>                             | MAF-4·3.82N <sub>2</sub>                             | MAF-4·4.33N <sub>2</sub>                             | MAF-4·4.33N <sub>2</sub>                             |
|-----------------------------------------------------------------|-----------------------------------------------------|------------------------------------------------------|------------------------------------------------------|------------------------------------------------------|------------------------------------------------------|
| Formula                                                         | C <sub>8</sub> H <sub>10</sub> N <sub>4.40</sub> Zn | C <sub>8</sub> H <sub>10</sub> N <sub>11.00</sub> Zn | C <sub>8</sub> H <sub>10</sub> N <sub>11.64</sub> Zn | C <sub>8</sub> H <sub>10</sub> N <sub>12.67</sub> Zn | C <sub>8</sub> H <sub>10</sub> N <sub>12.67</sub> Zn |
| <i>FW</i>                                                       | 233.17                                              | 325.64                                               | 342.45                                               | 348.99                                               | 348.99                                               |
| Space group                                                     | <i>I</i> -43 <i>m</i>                               | <i>I</i> -43 <i>m</i>                                | <i>I</i> -43 <i>m</i>                                | <i>I</i> -43 <i>m</i>                                | <i>I</i> -43 <i>m</i>                                |
| <i>T</i> / K                                                    | 293(2)                                              | 113(2)                                               | 111(2)                                               | 109(2)                                               | 100(2)                                               |
| <i>a</i> / Å                                                    | 17.039(3)                                           | 17.086(2)                                            | 17.120(2)                                            | 17.1236(19)                                          | 17.133(2)                                            |
| <i>V</i> / Å <sup>3</sup>                                       | 4946.6(13)                                          | 4987.7(11)                                           | 5018.1(12)                                           | 5020.9(10)                                           | 5029.3(12)                                           |
| <i>Z</i>                                                        | 12                                                  | 12                                                   | 12                                                   | 12                                                   | 12                                                   |
| <i>D<sub>c</sub></i> / g cm <sup>-3</sup>                       | 0.939                                               | 1.301                                                | 1.329                                                | 1.385                                                | 1.383                                                |
| <i>μ</i> / mm <sup>-1</sup>                                     | 1.466                                               | 1.485                                                | 1.479                                                | 1.483                                                | 1.481                                                |
| <i>R</i> <sub>int</sub>                                         | 0.0628                                              | 0.0561                                               | 0.1309                                               | 0.0501                                               | 0.0667                                               |
| <i>R</i> <sub>sig</sub>                                         | 0.0320                                              | 0.0271                                               | 0.0686                                               | 0.0265                                               | 0.0326                                               |
| <i>Completeness</i>                                             | 0.994                                               | 0.998                                                | 0.996                                                | 0.998                                                | 0.998                                                |
| <i>R</i> <sub>1</sub> / <i>wR</i> <sub>2</sub> ( <i>I</i> > 2σ) | 0.0415/0.0802                                       | 0.0362/0.0916                                        | 0.0629/0.1586                                        | 0.0295/0.0752                                        | 0.0333/0.0822                                        |
| <i>R</i> <sub>1</sub> / <i>wR</i> <sub>2</sub> (all data)       | 0.0499/0.0847                                       | 0.0378/0.0932                                        | 0.0648/0.1599                                        | 0.0300/0.0754                                        | 0.0342/0.0826                                        |
| GOF                                                             | 1.087                                               | 1.056                                                | 1.075                                                | 1.024                                                | 1.049                                                |
| Restraints                                                      | 0                                                   | 0                                                    | 0                                                    | 0                                                    | 0                                                    |
| Parameters                                                      | 37                                                  | 53                                                   | 64                                                   | 58                                                   | 58                                                   |
| Residue                                                         | 0.198/-0.500                                        | 0.495/-0.762                                         | 0.652/-0.628                                         | 0.944/-0.487                                         | 1.373/-0.597                                         |
| Flack                                                           | 0.01(3)                                             | 0.02(3)                                              | 0.04(6)                                              | 0.00(2)                                              | -0.04(2)                                             |

$$R_1 = \sum ||F_o| - |F_c|| / \sum |F_o|, wR_2 = [\sum w(F_o^2 - F_c^2)^2 / \sum w(F_o^2)^2]^{1/2}$$

**Table S2.** Crystallographic data and refinement parameters of MAF-7·xN<sub>2</sub>.

|                                                                 | MAF-7·0.2N <sub>2</sub>                            | MAF-7·3.50N <sub>2</sub>                            | MAF-7·4.33N <sub>2</sub>                            | MAF-7·3.50N <sub>2</sub>                            | MAF-7·3.95N <sub>2</sub>                            | MAF-7·4.33N <sub>2</sub>                            |
|-----------------------------------------------------------------|----------------------------------------------------|-----------------------------------------------------|-----------------------------------------------------|-----------------------------------------------------|-----------------------------------------------------|-----------------------------------------------------|
| Formula                                                         | C <sub>6</sub> H <sub>8</sub> N <sub>6.40</sub> Zn | C <sub>6</sub> H <sub>8</sub> N <sub>13.00</sub> Zn | C <sub>6</sub> H <sub>8</sub> N <sub>14.67</sub> Zn | C <sub>6</sub> H <sub>8</sub> N <sub>13.00</sub> Zn | C <sub>6</sub> H <sub>8</sub> N <sub>13.91</sub> Zn | C <sub>6</sub> H <sub>8</sub> N <sub>14.67</sub> Zn |
| <i>FW</i>                                                       | 235.16                                             | 327.62                                              | 350.97                                              | 327.62                                              | 340.43                                              | 350.97                                              |
| Space group                                                     | <i>I</i> -43 <i>m</i>                              | <i>I</i> -43 <i>m</i>                               | <i>I</i> -43 <i>m</i>                               | <i>I</i> -43 <i>m</i>                               | <i>I</i> -43 <i>m</i>                               | <i>I</i> -43 <i>m</i>                               |
| <i>T</i> / K                                                    | 293(2)                                             | 118(2)                                              | 115(2)                                              | 100(2)                                              | 100(2)                                              | 100(2)                                              |
| <i>a</i> / Å                                                    | 17.019(3)                                          | 17.0641(19)                                         | 17.082(2)                                           | 17.0550(8)                                          | 17.0659(12)                                         | 17.0797(19)                                         |
| <i>V</i> / Å <sup>3</sup>                                       | 4929.2(13)                                         | 4968.8(10)                                          | 4984.5(10)                                          | 4960.8(4)                                           | 4970.4(6)                                           | 4982.4(10)                                          |
| <i>Z</i>                                                        | 12                                                 | 12                                                  | 12                                                  | 12                                                  | 12                                                  | 12                                                  |
| <i>D<sub>c</sub></i> / g cm <sup>-3</sup>                       | 0.951                                              | 1.314                                               | 1.403                                               | 1.316                                               | 1.365                                               | 1.404                                               |
| <i>μ</i> / mm <sup>-1</sup>                                     | 1.475                                              | 1.495                                               | 1.498                                               | 1.497                                               | 1.498                                               | 1.498                                               |
| <i>R</i> <sub>int</sub>                                         | 0.0431                                             | 0.0357                                              | 0.0554                                              | 0.0807                                              | 0.0845                                              | 0.0441                                              |
| <i>R</i> <sub>sig</sub>                                         | 0.0242                                             | 0.0196                                              | 0.0310                                              | 0.0302                                              | 0.0595                                              | 0.0230                                              |
| Flack                                                           | 0.02(3)                                            | -0.02(3)                                            | 0.02(4)                                             | -0.00(4)                                            | 0.06(6)                                             | 0.00(2)                                             |
| <i>R</i> <sub>1</sub> / <i>wR</i> <sub>2</sub> ( <i>I</i> > 2σ) | 0.0369/0.0753                                      | 0.0341/0.0878                                       | 0.0423/0.1106                                       | 0.0422/0.1209                                       | 0.0629/0.1679                                       | 0.0302/0.0750                                       |
| <i>R</i> <sub>1</sub> / <i>wR</i> <sub>2</sub> (all data)       | 0.0470/0.0798                                      | 0.0347/0.0896                                       | 0.0426/0.1109                                       | 0.0422/0.1209                                       | 0.0632/0.1683                                       | 0.0306/0.0754                                       |
| GOF                                                             | 1.034                                              | 1.040                                               | 1.040                                               | 1.078                                               | 1.123                                               | 1.053                                               |
| Restraints                                                      | 0                                                  | 1                                                   | 0                                                   | 1                                                   | 0                                                   | 0                                                   |
| Parameters                                                      | 37                                                 | 50                                                  | 62                                                  | 50                                                  | 53                                                  | 62                                                  |
| Residue                                                         | 0.192/-0.542                                       | 0.497/-0.577                                        | 0.496/-0.552                                        | 0.860/-0.347                                        | 0.933/-0.893                                        | 0.588/-0.564                                        |
| Flack                                                           | 0.02(3)                                            | -0.02(3)                                            | 0.02(4)                                             | 0.00(4)                                             | 0.06(6)                                             | 0.00(2)                                             |

$$R_1 = \sum ||F_o| - |F_c|| / \sum |F_o|, wR_2 = [\sum w(F_o^2 - F_c^2)^2 / \sum w(F_o^2)^2]^{1/2}$$

**Table S3.** Adsorption sites and occupancies in MAF-4

| <i>T</i> / K | Site                    | <b>I</b>     | <b>II</b> | <b>III</b> | <b>IV</b> | <b>V</b>     | Sum <sup><i>d</i></sup> |
|--------------|-------------------------|--------------|-----------|------------|-----------|--------------|-------------------------|
|              | PS <sup><i>a</i></sup>  | -42 <i>m</i> | <i>m</i>  | 3 <i>m</i> | <i>mm</i> | -43 <i>m</i> |                         |
|              | NP <sup><i>b</i></sup>  | 6            | 24        | 8          | 12        | 2            | 26                      |
| 293          | SOF <sup><i>c</i></sup> | 0            | 0         | ~0         | ~0        | 0            | ~0                      |
| 113          |                         | 0            | 1         | 1          | 1         | 1            | 21                      |
| 111          |                         | 0.37         | 1         | 1          | 1         | 1            | 23                      |
| 109          |                         | 1            | 1         | 1          | 1         | 1            | 26                      |
| 100          |                         | 1            | 1         | 1          | 1         | 1            | 26                      |

<sup>*a*</sup> Point symmetry.

<sup>*b*</sup> Number of equivalent positions per unit cell.

<sup>*c*</sup> Site occupancy factor.

<sup>*d*</sup> Sum =  $\Sigma \text{SOF} \times \text{NP} / 2$  (sum of adsorbed molecules per  $\beta$ -cage).

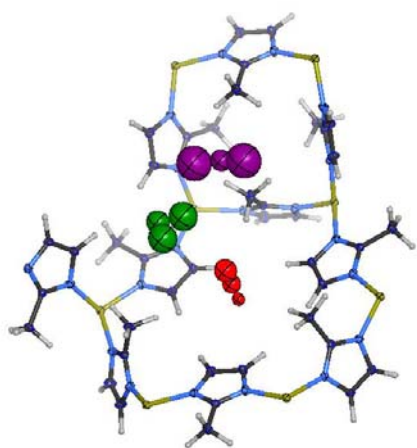

**Fig. S1.** Ortep plots of MAF-4·3.50N<sub>2</sub> measured at 113 K (30% probability).

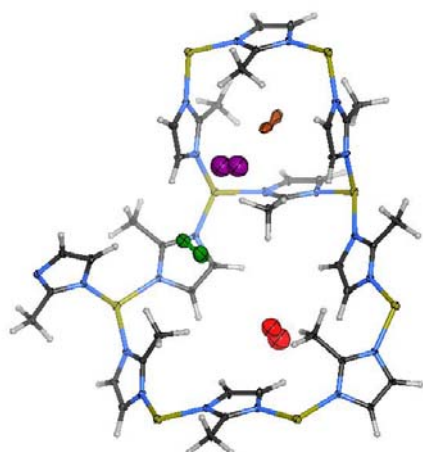

**Fig. S2.** Ortep plots of MAF-4·4.33N<sub>2</sub> measured at 109 K (30% probability).
